# Supplementary material for: Layered hybrid lattice architectures for broadband electromagnetic absorption and improved structural stiffness
Source: Royal Society of Chemistry journal article supplement (doi:10.1039/d5mh01846c), 2025-12-03
Supplement: d5mh01846c1.pdf [file d5mh01846c1.pdf]

## Supplementary Figures

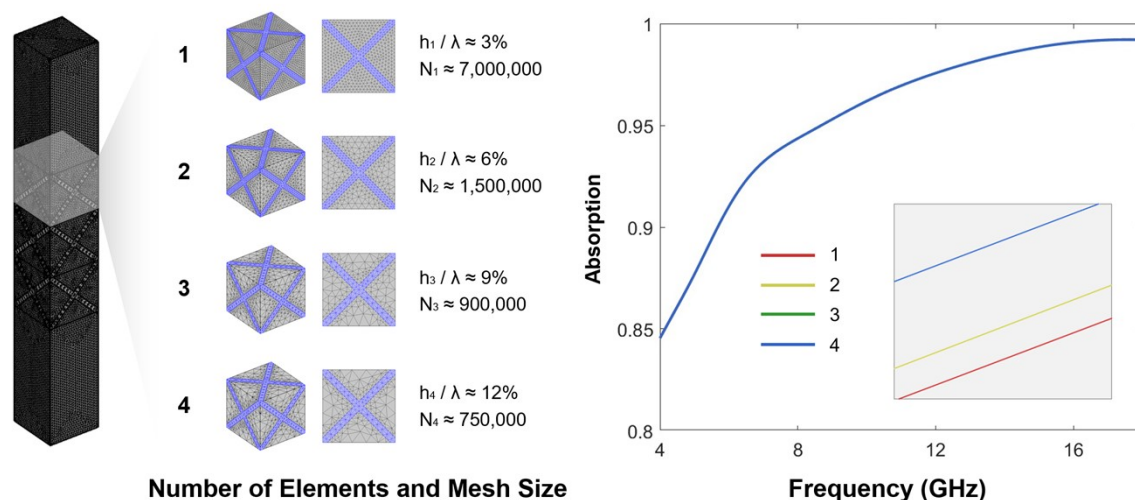

**Figure S1.** Mesh convergence test for the EM response for different mesh size configurations. Quadratic tetrahedral elements generate the computational mesh, with the maximum edge length of each element kept below 5% of the shortest incident wavelength (16.7 mm) to ensure numerical accuracy. Mesh resolution is tailored to each domain: the surrounding air region employs  $\approx 164,000$  elements with an edge length of  $\sim 0.1$  mm, whereas the solid lattice region uses  $\approx 27\,000$  elements refined to  $< 0.03$  mm to resolve the struts. The resulting absorption spectrum deviates by less than 0.1% from the finest-mesh reference over 4–18 GHz, confirming numerical convergence.

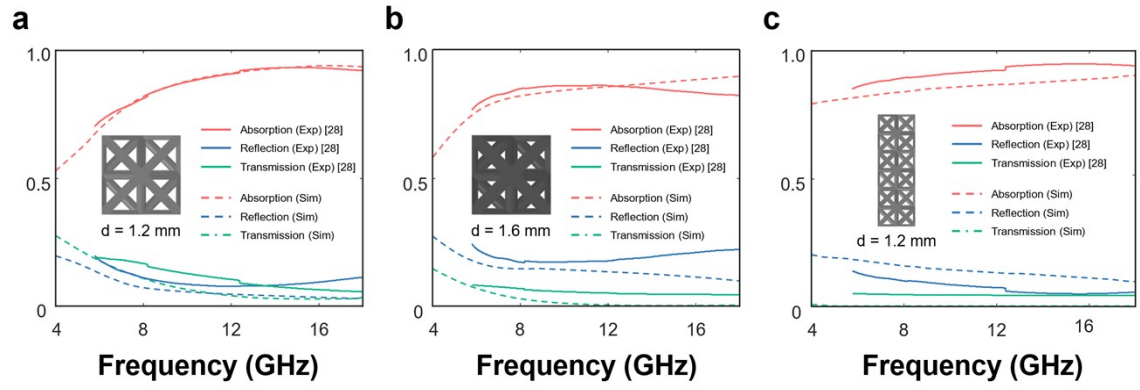

**Figure S2.** Comparison between simulated and experimental results<sup>1</sup> for the electromagnetic absorption of single-layer and multilayer OT lattices with a unit cell length of 10 mm. (a) Single-layer OT lattice with strut diameter  $d = 1.2$  mm, (b) Single-layer OT lattice with  $d = 1.6$  mm, and (c) Three-layer OT lattice with  $d = 1.2$  mm.

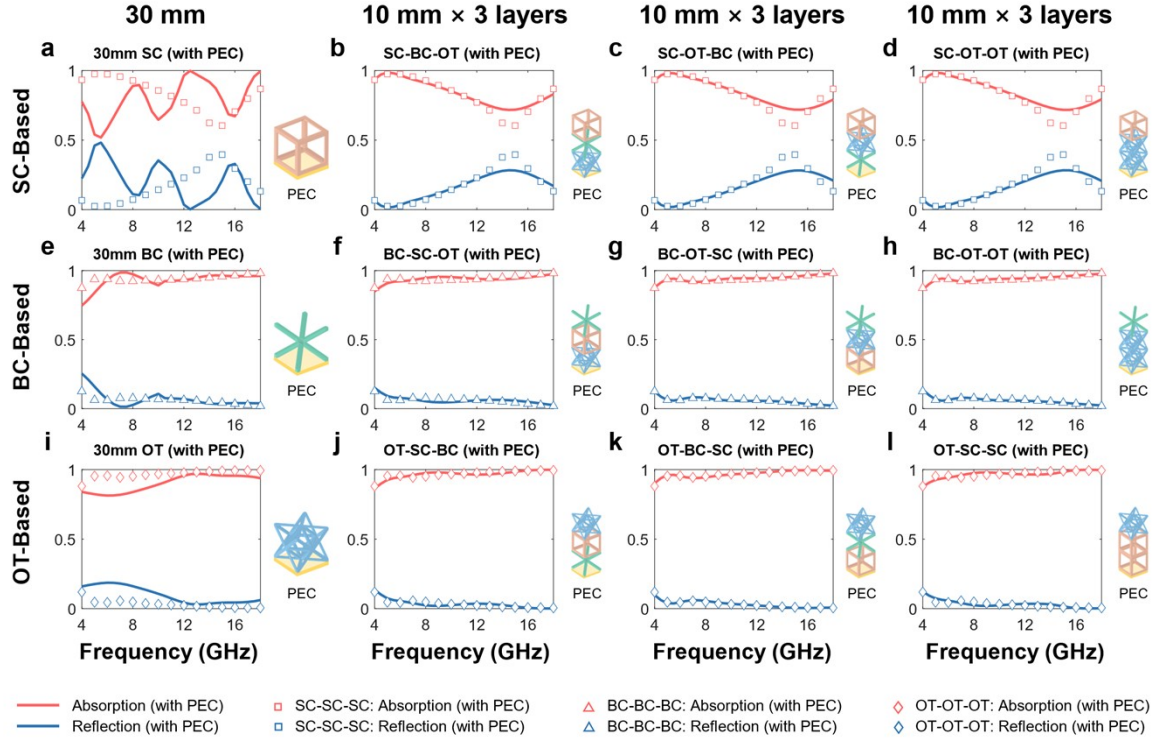

**Figure S3.** Electromagnetic response of single-layer and multilayer lattice structures with a PEC backing layer under normal incidence. (a–l) Absorption and reflection spectra over the 4–18 GHz frequency range for structures with a relative density of 0.1. Each row shows different stacking sequences of SC-based (a–d), BC-based (e–h), and OT-based (i–l) lattices. Because the PEC backing blocks all transmitted power, the transmission coefficient is identically zero.

## References

1. D. D. Lim, J. Park, J. Lee, D. Noh, J. Lee, J. Choi and W. Choi, *Additive Manufacturing*, 2022, **55**, 102856.
